# Supplementary material for: Comparison of the prognostic value of frailty assessment tools in patients aged ≥ 65 years hospitalized in a cardiac care unit with acute coronary syndrome
Source: PubMed Central journal article supplement — J Geriatr Cardiol. 2022 May 28;19(5):343–53. doi: 10.11909/j.issn.1671-5411.2022.05.010 (PMC9170905; doi:10.11909/j.issn.1671-5411.2022.05.010), 2022-05-28
Supplement: jgc-19-5-343-S1.pdf [file jgc-19-5-343-S1.pdf]

## Supplementary material:

**Table 1 Fried frailty scale (0-5 points - 1 point for each criterion).**

| Weight loss           | Self-reported unintentional weight loss ( $\geq 4.5$ kg in the last year)                                                                                                                                                                                                                                                                                                              |
|-----------------------|----------------------------------------------------------------------------------------------------------------------------------------------------------------------------------------------------------------------------------------------------------------------------------------------------------------------------------------------------------------------------------------|
| Exhaustion            | Based on two questions from the Center for Epidemiological Studies–Depression scale: “How often in the last week did you feel that everything you did was an effort?” and “How often in the last week did you feel that you could not get going. Answer: “a moderate amount of the time (3-4 days)” or “most of the time” to either of these questions fulfilled exhaustion criterion. |
| Low physical activity | Based on Minnesota Leisure Time Activity questionnaire. Physical activity < 383 kcal/week (men) and < 270 kcal/week (women).                                                                                                                                                                                                                                                           |
| Walk Time             | Time required to walk 4,57meters in a straight line:<br>$\geq 7$ seconds:<br><ul style="list-style-type: none"> <li>men: height <math>\leq 173</math> cm</li> <li>women: height <math>\leq 159</math> cm</li> </ul> $\geq 6$ seconds:<br><ul style="list-style-type: none"> <li>men: height &gt; 173 cm</li> <li>women: height &gt; 159 cm</li> </ul>                                  |
| Grip strength         | Handgrip strength dynamometer score:<br>Men:<br>BMI(kg/m <sup>2</sup> )    Cutoff for grip strength (kg)<br>$\leq 24$ $\leq 29$<br>24, 1 – 28 $\leq 30$<br>> 28 $\leq 32$<br>Women:<br>BMI (kg/m <sup>2</sup> )    Cutoff for grip strength (kg)<br>$\leq 23$ $\leq 17$<br>23, 1 – 26 $\leq 17,3$<br>> 29 $\leq 21$                                                                    |

BMI - body mass index Result: 3-5 points - frailty; 1-2 points - pre-frailty; 0 points - not frail.

**Table 2 The Edmonton Frail Scale.**

| Frailty domain          | Item                                                                                                                                                                                                                                       | 0 point                          | 1 point              | 2 point                                                |
|-------------------------|--------------------------------------------------------------------------------------------------------------------------------------------------------------------------------------------------------------------------------------------|----------------------------------|----------------------|--------------------------------------------------------|
| Cognition               | Please imagine that this pre-drawn circle is a clock. I would like you to place the numbers in the correct positions then place the hands to indicate a time of ‘ten after eleven’                                                         | No errors                        | Minor spacing errors | Other errors                                           |
| General health status   | In the past year, how many times have you been admitted to a hospital?                                                                                                                                                                     | 0                                | 1-2                  | > 2                                                    |
|                         | In general, how would you describe your health?                                                                                                                                                                                            | ‘Excellent’, ‘Very good’, ‘Good’ | ‘Fair’               | ‘Poor’                                                 |
| Functional independence | With how many of the following activities do you require help? (meal preparation, shopping, transportation, telephone, housekeeping, laundry, managing money, taking medications)                                                          | 0-1                              | 2-4                  | 5-8                                                    |
| Social support          | When you need help, can you count on someone who is willing and able to meet your needs?                                                                                                                                                   | Always                           | Sometimes            | Never                                                  |
| Medication use          | Do you use five or more different prescription medications on a regular basis?                                                                                                                                                             | No                               | Yes                  |                                                        |
|                         | At times, do you forget to take your prescription medications?                                                                                                                                                                             | No                               | Yes                  |                                                        |
| Nutrition               | Have you recently lost weight such that your clothing has become looser?                                                                                                                                                                   | No                               | Yes                  |                                                        |
| Mood                    | Do you often feel sad or depressed?                                                                                                                                                                                                        | No                               | Yes                  |                                                        |
| Continence              | Do you have a problem with losing control of urine when you don’t want to?                                                                                                                                                                 | No                               | Yes                  |                                                        |
| Functional performance  | I would like you to sit in this chair with your back and arms resting. Then, when I say ‘GO’, please stand up and walk at a safe and comfortable pace to the mark on the floor (approximately 3 m away), return to the chair and sit down’ | 0-10 s                           | 11-20 s              | One of >20 s patient unwilling, or requires assistance |

Result: 8-17 points - frailty; 6-7 points - pre-frailty; 0-5 points - not frail.

**Table 3 The FRAIL scale.**

|                |                                                                                                                                                                                                                                                                                                                                                                                              |
|----------------|----------------------------------------------------------------------------------------------------------------------------------------------------------------------------------------------------------------------------------------------------------------------------------------------------------------------------------------------------------------------------------------------|
| Fatigue        | "How much of the time during the past 4 weeks did you feel tired?" 1 = All of the time, 2 = Most of the time, 3 = Some of the time, 4 = A little of the time, 5 = None of the time. Responses of "1" or "2" are scored as 1 and all others as 0.                                                                                                                                             |
| Resistance     | "By yourself and not using aids, do you have any difficulty walking up 10 steps without resting?" 1 = Yes, 0 = No.                                                                                                                                                                                                                                                                           |
| Ambulation     | By yourself and not using aids, do you have any difficulty walking several hundred yards?" 1 = Yes, 0 = No.                                                                                                                                                                                                                                                                                  |
| Illnesses      | For 11 illnesses, participants are asked, "Did a doctor ever tell you that you have [illness]?" 1 = Yes, 0 = No. The total illnesses (0-11) are recoded as 0-4 = 0 and 5-11 = 1. The illnesses include hypertension, diabetes, cancer (other than a minor skin cancer), chronic lung disease, heart attack, congestive heart failure, angina, asthma, arthritis, stroke, and kidney disease. |
| Loss of weight | unintentional weight loss > 5% in the last year                                                                                                                                                                                                                                                                                                                                              |

Result: 3-5 points - frailty; 1-2 points - pre-frailty; 0 points - not frail.

**Table 4 The Clinical Frailty Scale.**

| Category                               | Symptoms                                                                                                                                |
|----------------------------------------|-----------------------------------------------------------------------------------------------------------------------------------------|
| 1. Very fit                            | Robust, active, energetic, well-motivated and fit; these people commonly exercise regularly and are in the most fit group for their age |
| 2. Well                                | Without active disease, but less fit than people in category 1                                                                          |
| 3. Well. With treated comorbid disease | Disease symptoms are well controlled compared with those in category 4                                                                  |
| 4. Apparently vulnerable               | Although not frankly dependent, these people commonly complain of being "slowed up" or have disease symptoms                            |
| 5. Mildly frail                        | With limited dependence on others for instrumental activities of daily living                                                           |
| 6. Moderately frail                    | Help is needed with both instrumental and non-instrumental activities of daily living                                                   |
| 7. Severely frail                      | Completely dependent on others for the activities of daily living, or terminally ill                                                    |

Result: 5-7 category - frailty; 4 category - pre-frailty; 1-3 category - not frail.
